# Supplementary material
Source: HighWire-hosted journal article supplement (https://bmjopen.bmj.com/content/15/2/e092032)
Supplement: inline-supplementary-material-2 [file inline-supplementary-material-2.pdf]

Siefried et al - NABU

Supplementary Table 2 - Schedule of Assessments

|                                                  | Study day | 0 <sup>a</sup> | 1 <sup>b</sup> | 7    | 14   | 21   | 28   | 35   | 42   | 49   | 56   | 63   | 70   | 77   | 84   | 112  |
|--------------------------------------------------|-----------|----------------|----------------|------|------|------|------|------|------|------|------|------|------|------|------|------|
| Protocol window - days                           | -14       | 0              | +/-3           | +/-3 | +/-3 | +/-3 | +/-3 | +/-3 | +/-3 | +/-3 | +/-3 | +/-3 | +/-3 | +/-3 | +/-3 | +/-3 |
| Study Week                                       | 0         | 0              | 1              | 2    | 3    | 4    | 5    | 6    | 7    | 8    | 9    | 10   | 11   | 12   | 12   | 16   |
| Assessments                                      |           |                |                |      |      |      |      |      |      |      |      |      |      |      |      |      |
| Pre-screening                                    |           | •              |                |      |      |      |      |      |      |      |      |      |      |      |      |      |
| Informed consent                                 |           | •              |                |      |      |      |      |      |      |      |      |      |      |      |      |      |
| Demographics, medical history                    |           | •              |                |      |      |      |      |      |      |      |      |      |      |      |      |      |
| Confirm eligibility                              |           | •              | •              |      |      |      |      |      |      |      |      |      |      |      |      |      |
| Prior concomitant medication                     |           | •              |                |      |      |      |      |      |      |      |      |      |      |      |      |      |
| Medical review                                   |           | •              |                |      |      |      |      |      |      |      |      |      |      |      | •    |      |
| Weight                                           |           |                | •              | •    | •    | •    | •    | •    | •    | •    | •    | •    | •    | •    | •    |      |
| Concomitant medication                           |           | •              | •              | •    | •    | •    | •    | •    | •    | •    | •    | •    | •    | •    | •    | •    |
| Concomitant psychosocial care                    |           | •              | •              | •    | •    | •    | •    | •    | •    | •    | •    | •    | •    | •    | •    | •    |
| Investigational Product                          |           |                |                |      |      |      |      |      |      |      |      |      |      |      |      |      |
| Study medication dispensed                       |           |                | •              | •    |      | •    |      | •    |      | •    |      | •    |      | •    |      |      |
| Medication pack returned for pill count          |           |                |                | •    |      | •    |      | •    |      | •    |      | •    |      | •    | •    |      |
| Safety                                           |           |                |                |      |      |      |      |      |      |      |      |      |      |      |      |      |
| Adverse events                                   |           |                | •              | •    | •    | •    | •    | •    | •    | •    | •    | •    | •    | •    | •    | •    |
| Blood pressure, pulse, temperature               |           | •              | •              | •    | •    | •    | •    | •    | •    | •    | •    | •    | •    | •    | •    | •    |
| C-SSRS Lifetime/Recent                           |           |                | •              |      |      |      |      |      |      |      |      |      |      |      |      |      |
| C-SSRS Since Last Visit                          |           |                |                |      |      |      | •    |      |      |      | •    |      |      |      | •    | •    |
| Pathology                                        |           |                |                |      |      |      |      |      |      |      |      |      |      |      |      |      |
| hCG <sup>±</sup>                                 |           | •              |                |      |      |      | •    |      |      |      | •    |      |      |      | •    |      |
| UDS POC all substances                           |           | •              |                |      |      |      |      |      |      |      |      |      |      |      |      |      |
| UDS POC opioids                                  |           |                | • <sup>d</sup> |      |      |      | •    |      |      |      | •    |      |      |      | •    |      |
| UDS POC MA                                       |           |                | •              | •    | •    | •    | •    | •    | •    | •    | •    | •    | •    | •    | •    |      |
| Liver function tests                             |           | •              |                |      |      |      |      |      |      |      |      |      |      |      |      |      |
| Questionnaires                                   |           |                |                |      |      |      |      |      |      |      |      |      |      |      |      |      |
| TLFB (alcohol, MA, opioids, cigarettes/nicotine) |           | •              | • <sup>d</sup> |      |      |      | •    |      |      |      | •    |      |      |      | •    | •    |
| SURGE                                            |           | •              | •              |      |      |      | •    |      |      |      | •    |      |      |      | •    | •    |
| Daily methamphetamine use <sup>c</sup>           |           |                | •              | •    | •    | •    | •    | •    | •    | •    | •    | •    | •    | •    | •    |      |
| Daily adherence <sup>c</sup>                     |           |                | •              | •    | •    | •    | •    | •    | •    | •    | •    | •    | •    | •    | •    |      |
| SMAQ                                             |           |                |                | •    | •    | •    | •    | •    | •    | •    | •    | •    | •    | •    | •    |      |
| WURS                                             |           |                | •              |      |      |      |      |      |      |      |      |      |      |      |      |      |
| ESSI                                             |           |                | •              |      |      |      |      |      |      |      |      |      |      |      |      |      |
| Promis-29                                        |           |                | •              |      |      |      |      |      |      |      |      |      |      |      | •    |      |
| DASS-21                                          |           |                | •              |      |      |      |      |      |      |      |      |      |      |      | •    |      |
| CVAS                                             |           |                | •              |      |      |      |      |      |      |      |      |      |      |      | •    |      |
| AWQ                                              |           |                | •              |      |      |      |      |      |      |      |      |      |      |      | •    |      |
| TSQM v. II                                       |           |                |                |      |      |      |      |      |      |      |      |      |      |      | •    |      |
| Optional Interview                               |           |                |                |      |      |      |      |      |      |      |      |      |      |      |      |      |
| Qualitative interview                            |           |                |                |      |      |      |      |      |      |      |      |      |      |      |      | ↔    |

Siefried et al - NABU

Supplementary Table 2 - Schedule of Assessments

|         |                                                                 |           |                                                                                                               |
|---------|-----------------------------------------------------------------|-----------|---------------------------------------------------------------------------------------------------------------|
| a       | = screening                                                     | b         | = baseline (Day 1, first dose of study investigational product)                                               |
| •       | = study activity                                                | c         | = daily smartphone EMA (self-report)                                                                          |
| ↔       | = study activity conducted any time on indicated days inclusive | ±         | = people of childbearing potential only                                                                       |
|         | = post-primary endpoint (taper-down and follow-up periods)      | d         | = TLFB, UDS POC (opioids) must be repeated on day of first dose if screening and baseline visits not combined |
| AWQ     | Amphetamine Withdrawal Questionnaire                            | Promis-29 | Patient-Reported Outcomes Measurement Information System-29                                                   |
| C-SSRS  | Columbia Suicide Severity Rating Scale                          | SMAQ      | Simplified Medication Adherence Questionnaire                                                                 |
| CVAS    | Craving Visual Analogue Scale                                   | SURGE     | Substance Use Recovery Goals and Expectations                                                                 |
| DASS-21 | Depression Anxiety Stress Scales                                | TLFB      | Timeline Follow-Back                                                                                          |
| ESSI    | ENRICH Social Support Inventory                                 | TSQM      | Treatment Satisfaction Questionnaire for Medication                                                           |
| hCG     | Human chorionic gonadotropin (urine)                            | UDS POC   | Urine drug screen – point of care                                                                             |
|         |                                                                 | WURS      | Wender Utah Rating Scale                                                                                      |
